# Supplementary material for: Predictors of survival in patients with influenza pneumonia-related severe acute respiratory distress syndrome treated with prone positioning
Source: Springer Nature journal article supplement (doi:10.1186/s13613-018-0440-4), 2018-09-24
Supplement: MOESM1 [file 16148010]

**Supplementary Material 1: Cox regression analysis of clinical variables associated with 60-day mortality in influenza pneumonia-related ARDS with prone positioning**

Model 1: Couple is  $\Delta$  Peak airway pressure and  $\Delta$  Dynamic driving pressure

| Clinical variables                                      | Univariate            |         | Multivariate          |         |
|---------------------------------------------------------|-----------------------|---------|-----------------------|---------|
|                                                         | Hazard ratio (95% CI) | P value | Hazard ratio (95% CI) | P value |
| APACHE II score                                         | 1.089 (1.035-1.147)   | 0.001*  | 1.042 (0.982-1.106)   | 0.178   |
| PSI                                                     | 1.015 (1.005-1.026)   | 0.003*  | 1.020 (1.009-1.032)   | <0.001* |
| Renal replacement therapy                               | 5.355 (2.159-13.281)  | 0.000*  | 6.248 (2.245-17.389)  | <0.001* |
| $\Delta$ Peak airway pressure (cm H <sub>2</sub> O)     | 1.143 (1.019-1.282)   | 0.022*  | 1.064 (0.915-1.238)   | 0.422   |
| $\Delta$ Dynamic driving pressure (cm H <sub>2</sub> O) | 0.925 (0.871-0.983)   | 0.011*  | 1.369 (1.090-1.719)   | 0.007*  |

*ARDS*: acute respiratory distress syndrome; *CI*: confidence interval; *APACHE II*: Acute Physical and Chronic Health Evaluation; *PSI*: pneumonia severity index;  $\Delta$ : difference between before and after prone positioning 1 day.

\*p< 0.05

**Supplementary Material 1: Cox regression analysis of clinical variables associated with 60-day mortality in influenza pneumonia-related ARDS with prone positioning**

Model 2: Couple is  $\Delta$  Dynamic driving pressure and  $\Delta$  Dynamic compliance

| Clinical variables                                      | Univariate            |         | Multivariate          |         |
|---------------------------------------------------------|-----------------------|---------|-----------------------|---------|
|                                                         | Hazard ratio (95% CI) | P value | Hazard ratio (95% CI) | P value |
| APACHE II score                                         | 1.089 (1.035-1.147)   | 0.001*  | 1.042 (0.982-1.106)   | 0.178   |
| PSI                                                     | 1.015 (1.005-1.026)   | 0.003*  | 1.020 (1.009-1.032)   | <0.001* |
| Renal replacement therapy                               | 5.355 (2.159-13.281)  | 0.000*  | 6.248 (2.245-17.389)  | <0.001* |
| $\Delta$ Dynamic driving pressure (cm H <sub>2</sub> O) | 1.147 (1.008-1.305)   | 0.037*  | 1.372 (1.095-1.718)   | 0.006*  |
| $\Delta$ Dynamic compliance (ml/cm H <sub>2</sub> O)    | 0.925 (0.871-0.983)   | 0.011*  | 0.941 (0.872-1.015)   | 0.117   |

*ARDS*: acute respiratory distress syndrome; *CI*: confidence interval; *APACHE II*: Acute Physical and Chronic Health Evaluation; *PSI*: pneumonia severity index;  $\Delta$ : difference between before and after prone positioning 1 day.

\*p< 0.05

**Supplementary Material 1: Cox regression analysis of clinical variables associated with 60-day mortality in influenza pneumonia-related ARDS with prone positioning**

Model 3: Couple is  $\Delta$  Peak airway pressure and  $\Delta$  Dynamic compliance

| Clinical variables                                   | Univariate            |         | Multivariate          |         |
|------------------------------------------------------|-----------------------|---------|-----------------------|---------|
|                                                      | Hazard ratio (95% CI) | P value | Hazard ratio (95% CI) | P value |
| APACHE II score                                      | 1.089 (1.035-1.147)   | 0.001*  | 1.042 (0.982-1.106)   | 0.178   |
| PSI                                                  | 1.015 (1.005-1.026)   | 0.003*  | 1.020 (1.009-1.032)   | <0.001* |
| Renal replacement therapy                            | 5.355 (2.159-13.281)  | 0.000*  | 6.248 (2.245-17.389)  | <0.001* |
| $\Delta$ Peak airway pressure (cm H <sub>2</sub> O)  | 1.143 (1.019-1.282)   | 0.022*  | 0.987 (0.820-1.188)   | 0.899   |
| $\Delta$ Dynamic compliance (ml/cm H <sub>2</sub> O) | 0.925 (0.871-0.983)   | 0.011*  | 0.908 (0.851-1.012)   | 0.076   |

*ARDS*: acute respiratory distress syndrome; *CI*: confidence interval; *APACHE II*: Acute Physical and Chronic Health Evaluation; *PSI*: pneumonia severity index;  $\Delta$ : difference between before and after prone positioning 1 day.

\*p< 0.05
